# Supplementary material for: Vortex-Assisted Dispersive Molecularly Imprinted Polymer-Based Solid Phase Extraction of Acetaminophen from Water Samples Prior to HPLC-DAD Determination
Source: MDPI journal article supplement (doi:10.3390/separations8100194), 2021-10-19
Supplement: s1 [file s1]

Archive with 1 entries (1 files):
- separations-1410961-supplementary.pdf
