# Supplementary material for: Vortex-Assisted Dispersive Molecularly Imprinted Polymer-Based Solid Phase Extraction of Acetaminophen from Water Samples Prior to HPLC-DAD Determination
Source: MDPI journal article supplement (doi:10.3390/separations8100194), 2021-10-19
Supplement: s1 [file s1 › separations-1410961-supplementary.pdf]

Supplementary materials

# Vortex-Assisted Dispersive Molecularly Imprinted Polymer-Based Solid Phase Extraction of Acetaminophen from Water Samples Prior to HPLC-DAD Determination

Neliswa Mpayipheli <sup>1,2</sup>, Anele Mpupa <sup>1,2</sup> and Philiswa Nosizo Nomngongo <sup>1,2,3,\*</sup>

<sup>1</sup> Department of Chemical Sciences, University of Johannesburg, Doornfontein Campus, P.O. Box 17011, Doornfontein 2028, South Africa; mpayiphelin@gmail.com (N.M.); ampupa@uj.ac.za (A.M.)

<sup>2</sup> Department of Science and Innovation (DSI)/National Research Foundation (NRF) South African Research Chair Initiative (SARChI), Nanotechnology for Water, University of Johannesburg, Doornfontein 2028, South Africa

\* Correspondence: pnnomngongo@uj.ac.za

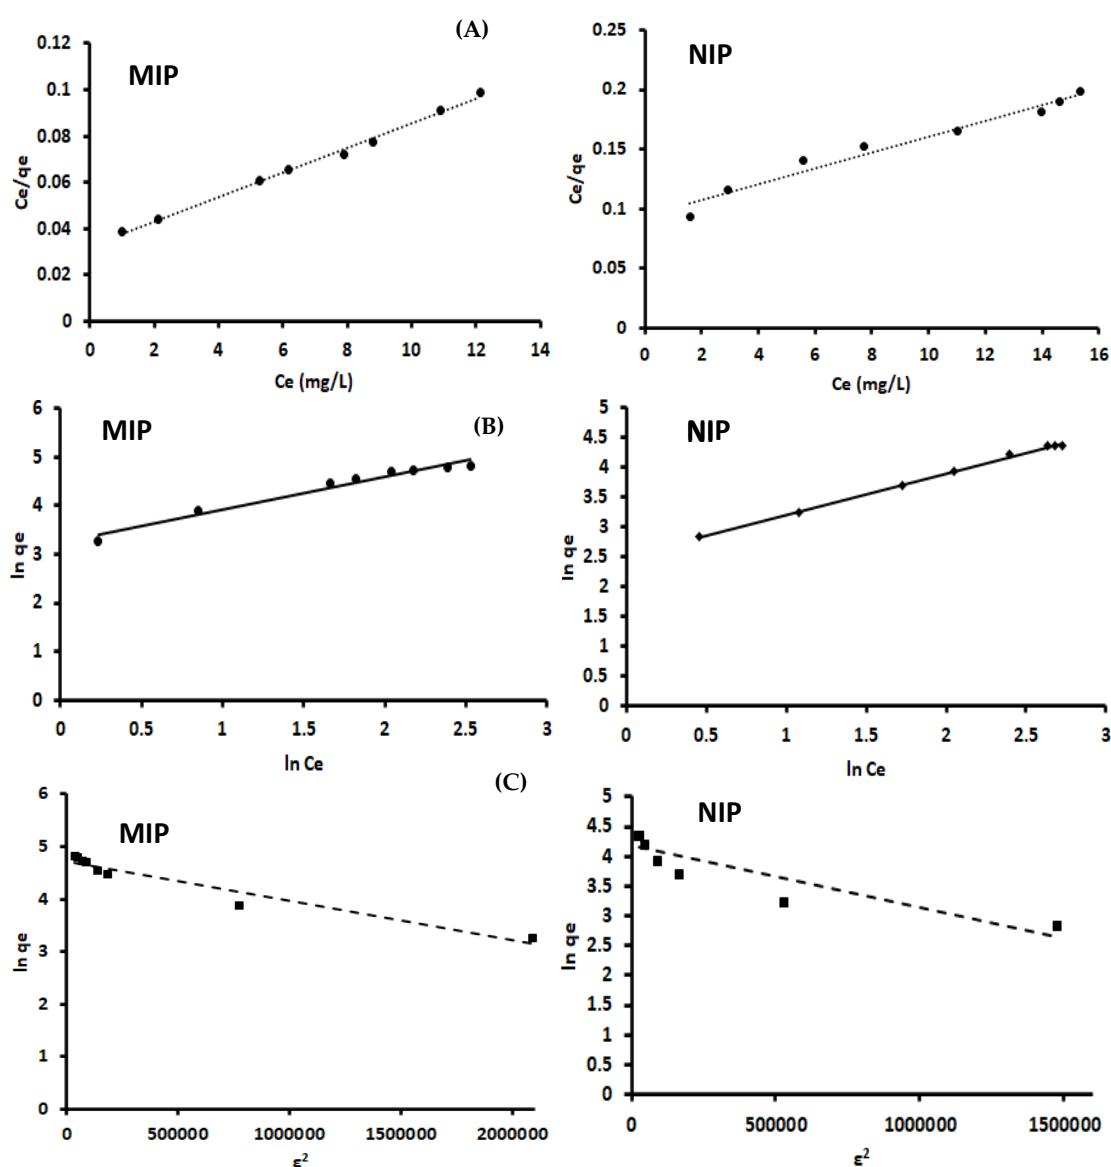

Figure S1: Isotherms models (A) Langmuir, (B) Freundlich, and (C) Dubinin–Radushkevich.

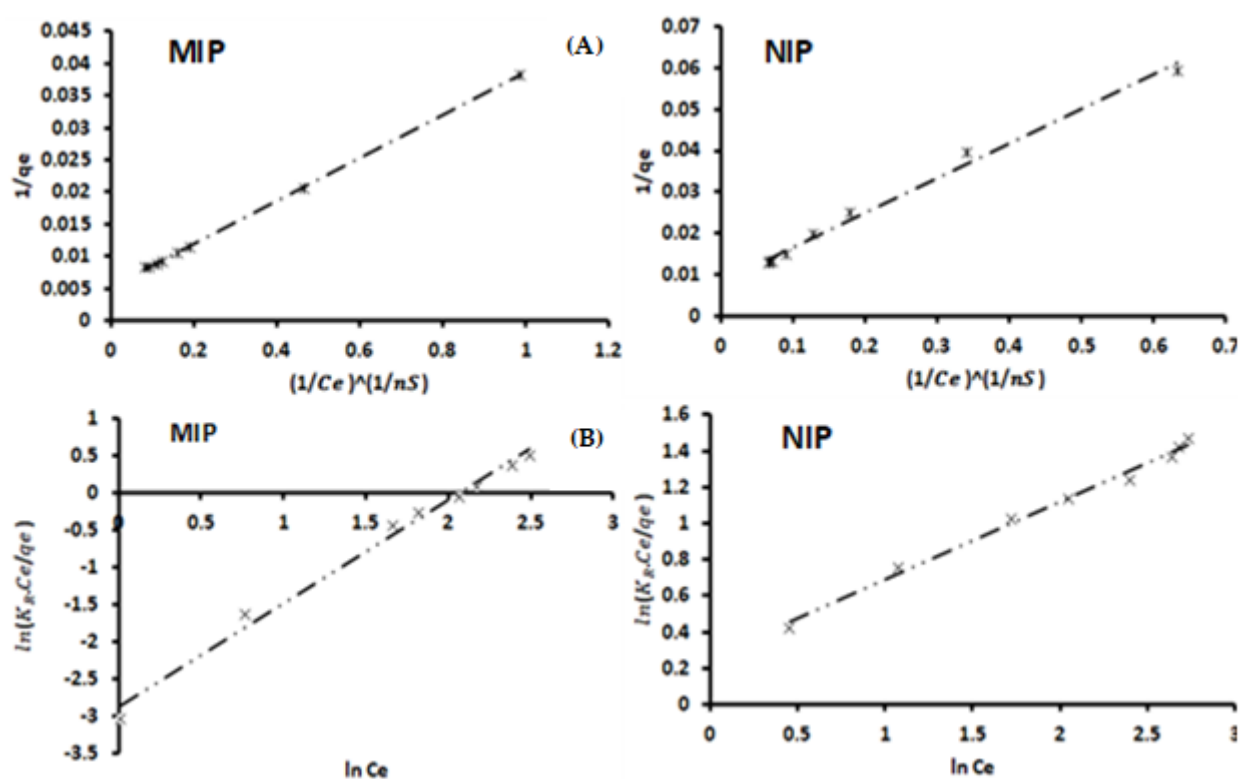

Figure S2: Isotherms models (A) Sips and (B) Redlich–Peterson.
